# Supplementary material for: Global early replication disrupts gene expression and chromatin conformation in a single cell cycle
Source: PubMed Central journal article supplement (PMC9575230; doi:10.1186/s13059-022-02788-7), 2022-10-17
Supplement: 13059_2022_2788_MOESM1_ESM.pdf [file 13059_2022_2788_MOESM1_ESM.pdf]

Fig S1

A

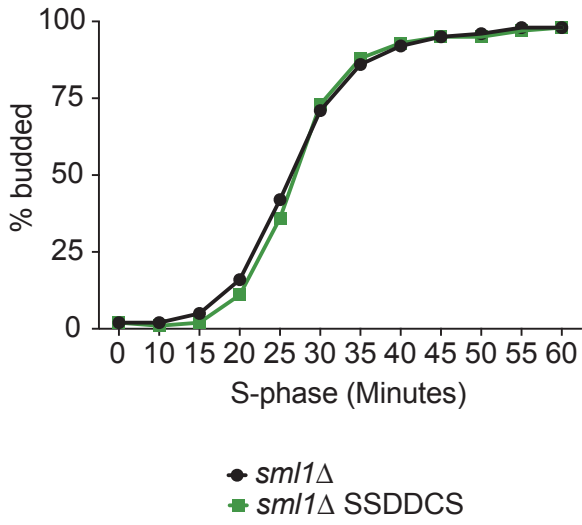

B

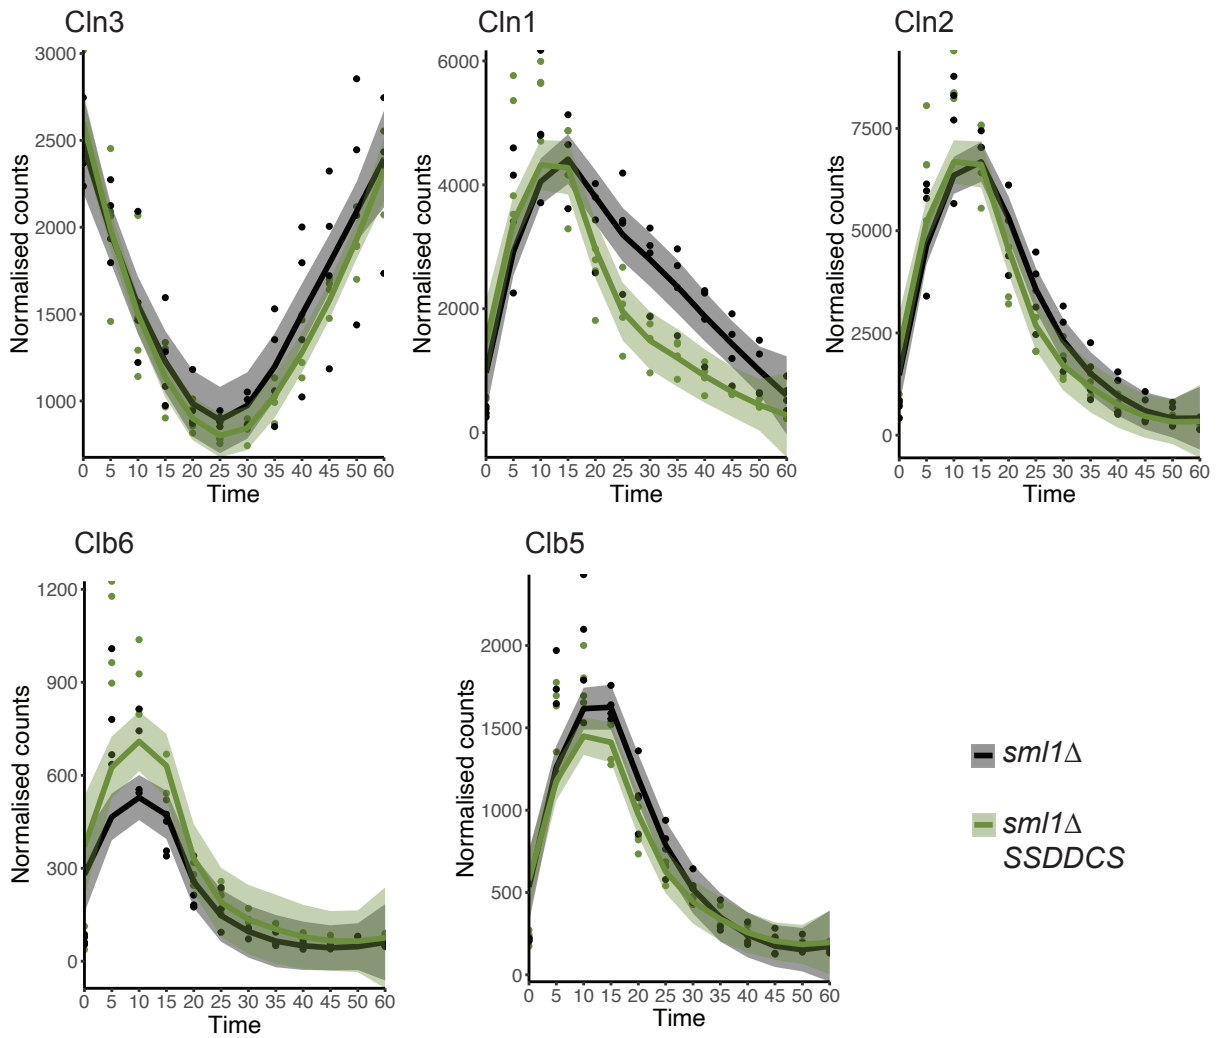

Fig. S2

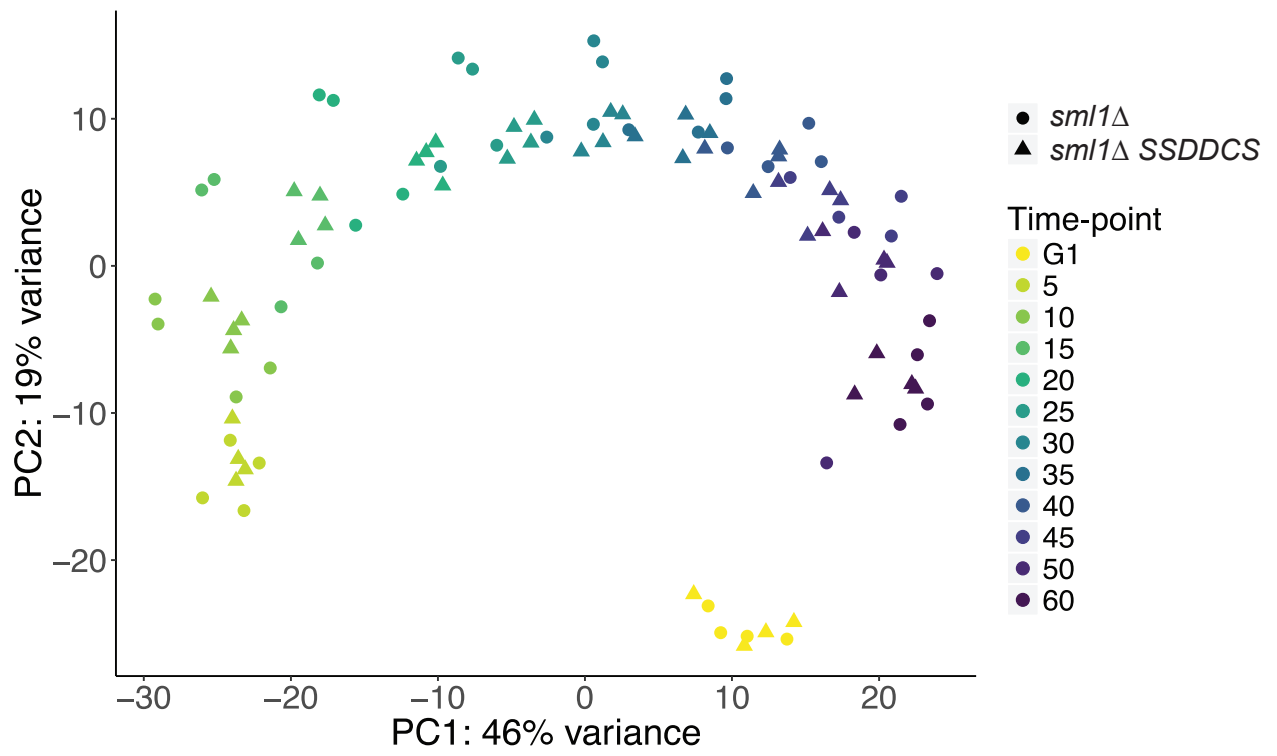

Fig. S3

A

$T_{rep}$  change at DE genes in the *SSDDCS* strain

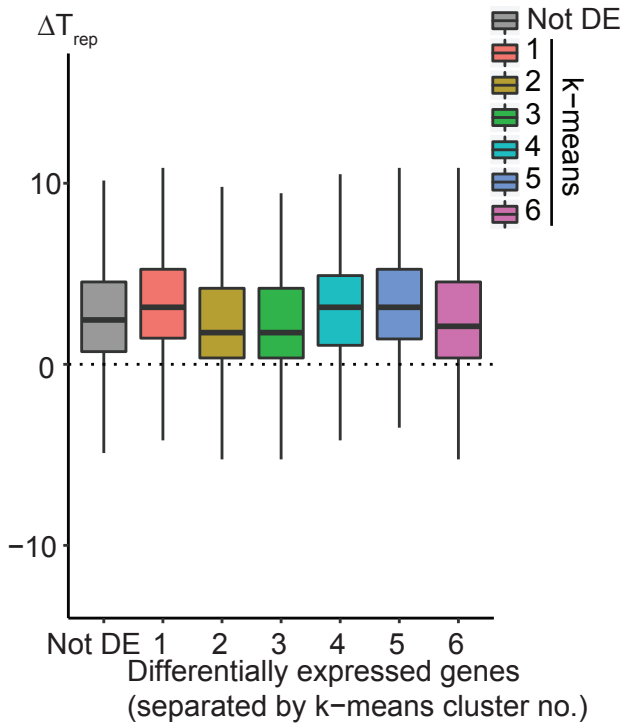

B

Distance of DE genes to Origins

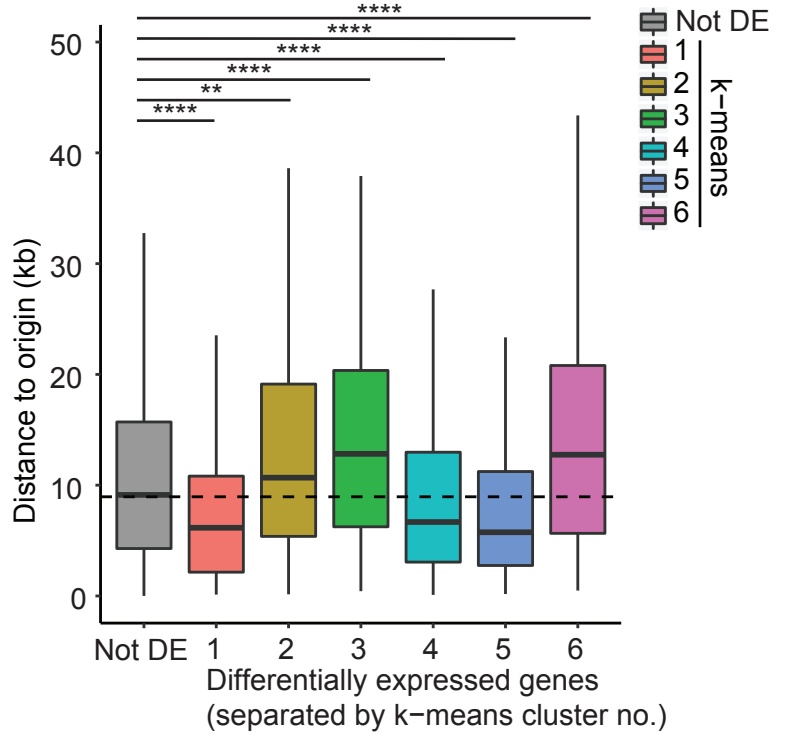

C

Distance of DE genes to Telomeres

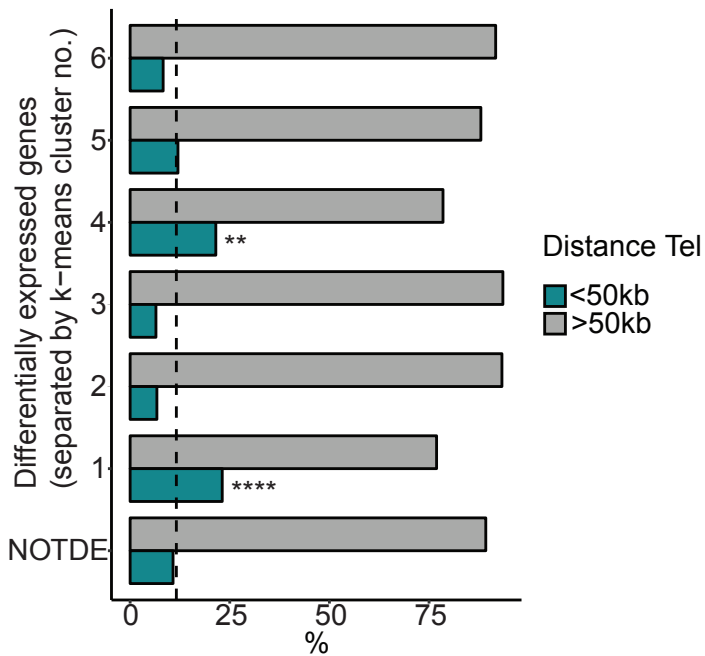

D

Distance of DE genes to centromeres

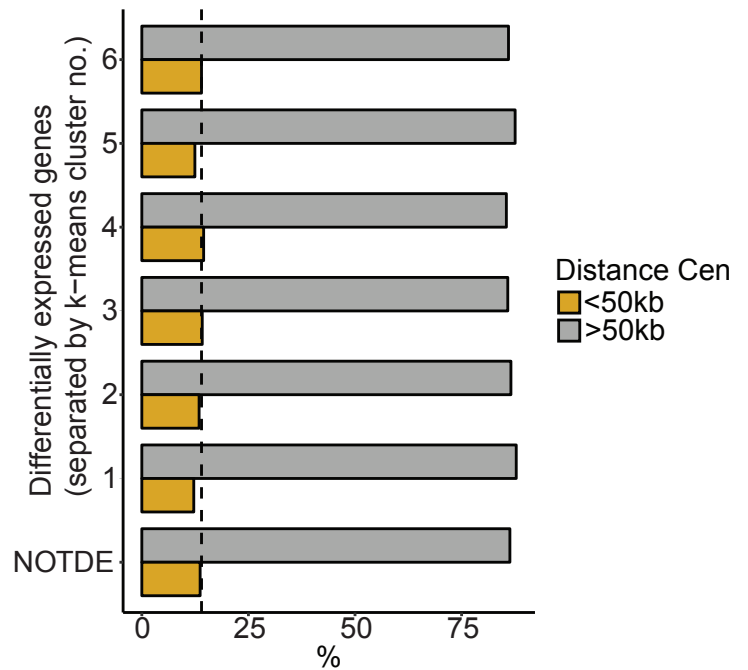

Fig. S4

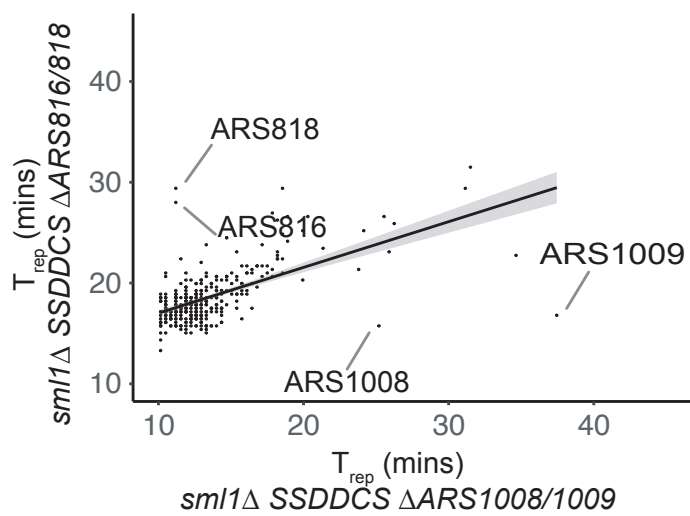

Supplementary Figure 5

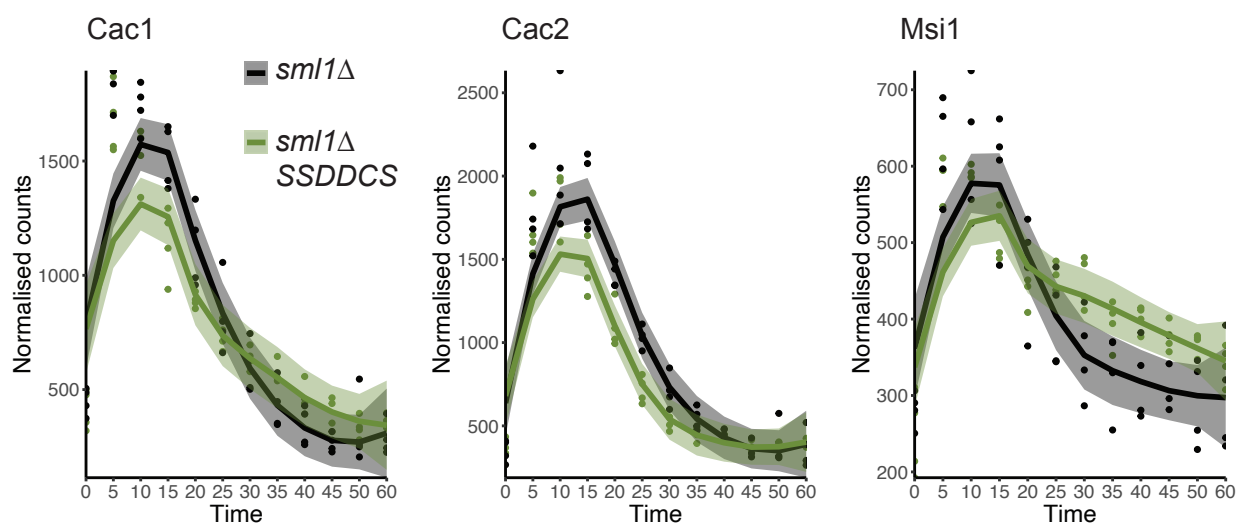

## Supplementary Figure Legends

### Fig. S1. Overexpression of *SSDDCS* does not affect the G1-S transition.

- A. Budding index of the experiment from Figure 1A and 2A. Budding is an indicator of G1-CDK activity.
- B. Gene expression (from the RNA-seq analysis, Figure 2) of the G1 cyclins (*Cln1-3*) and S-phase cyclins (*Clb5-6*) is the same between strains indicating that the G1-S transition is not affected in the *SSDDCS* strain.

### Fig. S2. PCA analysis of batch effects in the RNA-seq datasets.

Principal component analysis (PCA) plot illustrating the clustering of individual replicates per time-point and strain. Samples are mostly clustered by time-point, illustrating the cell cycle nature of gene expression regulation in budding yeast  $n = 4$ .

### Fig. S3. Analysis of the proximity of differentially expressed genes (DE) to origins, telomeres and centromeres.

- A) Distribution of  $\Delta T_{\text{rep}}$  (*sml1Δ* - *sml1Δ SSDDCS*) for all genes, divided into the k-means clusters from Figure 2C. The dotted line marks 0 (no difference in  $T_{\text{rep}}$ ).
- B) Distribution of gene distances to the closest origin for every gene in the genome, split by k-means cluster. NOT DE represents all non-differentially expressed genes. Dashed horizontal line marks the genome-wide median gene distance to the closest origin = 8.9 kb. p-values are from pairwise comparisons of each k-means cluster versus the non-DE genes using Wilcoxon rank sum test. \*\*\*\*  $p < 0.0001$ , \*\*  $p < 0.01$ .
- C) Proportion of genes which are within or without sub-telomeric regions (less or more than 50kb away from the closest telomere, respectively). Vertical dashed line marks the percentage of all genes located in sub-telomeric regions = 12%. p-values are from an exact binomial test comparison to non-DE genes. \*\*\*\*  $p < 0.0001$ , \*\*  $p < 0.01$ .

D) Proportion of genes which are within or without sub-centromeric regions (less or more than 50kb away from the centromere, respectively). Vertical dashed line marks the percentage of all genes located in sub-centromeric regions = 14%. All groups had the expected proportion of genes in sub-centromeric regions.

**Fig. S4. Analysis of the  $T_{rep}$  for all origins between the origin deletion strains.**

Comparison of the  $T_{rep}$  for all origins between the *sml1* $\Delta$  *SSDDCS*  $\Delta$ *ARS816/818* strain (y-axis) and the *sml1* $\Delta$  *SSDDCS*  $\Delta$ *ARS1008/1009* strain (x-axis). This graph shows that the mutated origins deviate the most from the best fit line for all origins, indicating that the other origins have a similar  $T_{rep}$  when comparing between these strains.

**Fig. S5. Overexpression of SSDDCS does not affect the expression of the CAF-1 complex.**

Gene expression (from the RNA-seq analysis, Figure 2) of the CAF-1 complex components Cac1, Cac2 and Msi1.
